# Supplementary material for: A novel scoring schema for peptide identification by searching protein sequence databases using tandem mass spectrometry data
Source: Springer Nature journal article supplement (doi:10.1186/1471-2105-7-222), 2006-04-26

Figure 4

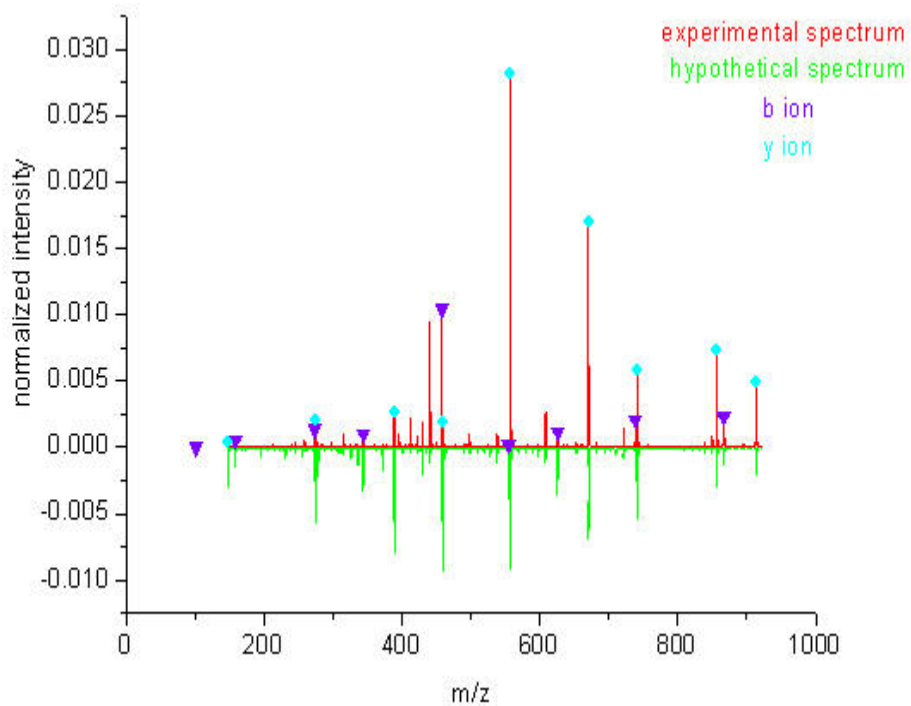

Supplement: 12859_2005_961_MOESM4_ESM.pdf [file 12859_2005_961_MOESM4_ESM.pdf]
